# Supplementary material
Source: publisher site journal article supplement (https://www.dovepress.com/article/488507)
Supplement: Supplementary file 1 [file get_supplementary_file.php]

**SUPPLEMENTARY DATA**

# Methods

## NHs prototype stability in endothelial cell growth medium (CM)

The stability of NHs prototype upon dilution of 1:25 (v/v) with CM was assessed by DLS analysis (Litesizer 500, Anton Paar, Turin, Italy) as reported in section “Storage stability studies”; three batches were analysed and, for each batch, three measurements were performed.

## Confocal imaging

HUVEC cells treated with NH@FITC-dex were observed using a CLSM as reported in section “Cellular uptake”, and 2D images (exported 2D total intensity projection images of the cytoskeleton channel, nuclei channel and NH@FITC-dex channel for each *Z*-stack) were acquired. Such images were processed with a software associated with the microscope (see section “Cellular uptake”).

# Results

***NHs prototype stability in CM***

For effective targeting of retinal cells, the NHs should be characterized by a hydrodynamic diameter lower than 350 nm.35 Given the critical influence of pH on the NHs properties, the hydrodynamic diameter of the NHs prototype diluted 1:25 (v/v) in CM was evaluated before performing cellular uptake test on HUVEC cells; after dilution, the colloidal dispersion maintained an approximately neutral pH.

Figure 1S highlights that no statistically significant differences occur between N3 prototype as such and N3 diluted 1:25 (v/v) in CM, thus confirming that NHs do not aggregate upon dilution in CM and suggesting that the prototype is able to maintain its capability to be uptaken by the epithelial retinal cells.


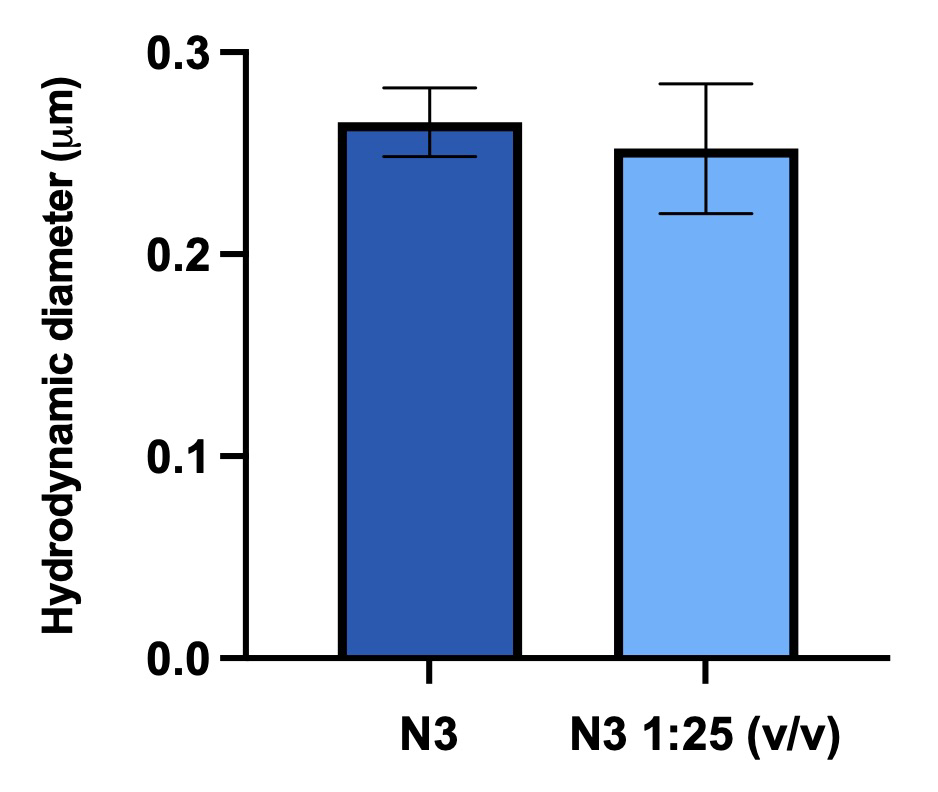


**Figure 1S** Hydrodynamic diameter of N3 prototype before and after dilution 1:25 (v/v) in CM (mean value ± s.d.; n=3). One-way ANOVA; T test (P value <0.05).

***Z-stacks***

Figure 2S shows a series of fifteen Z-stack images of HUVEC cells treated with NH@FITC-dex. These images clearly pointed out that loaded NHs (marked in green) were successfully internalized by the cells and not only absorbed on their surface.

**
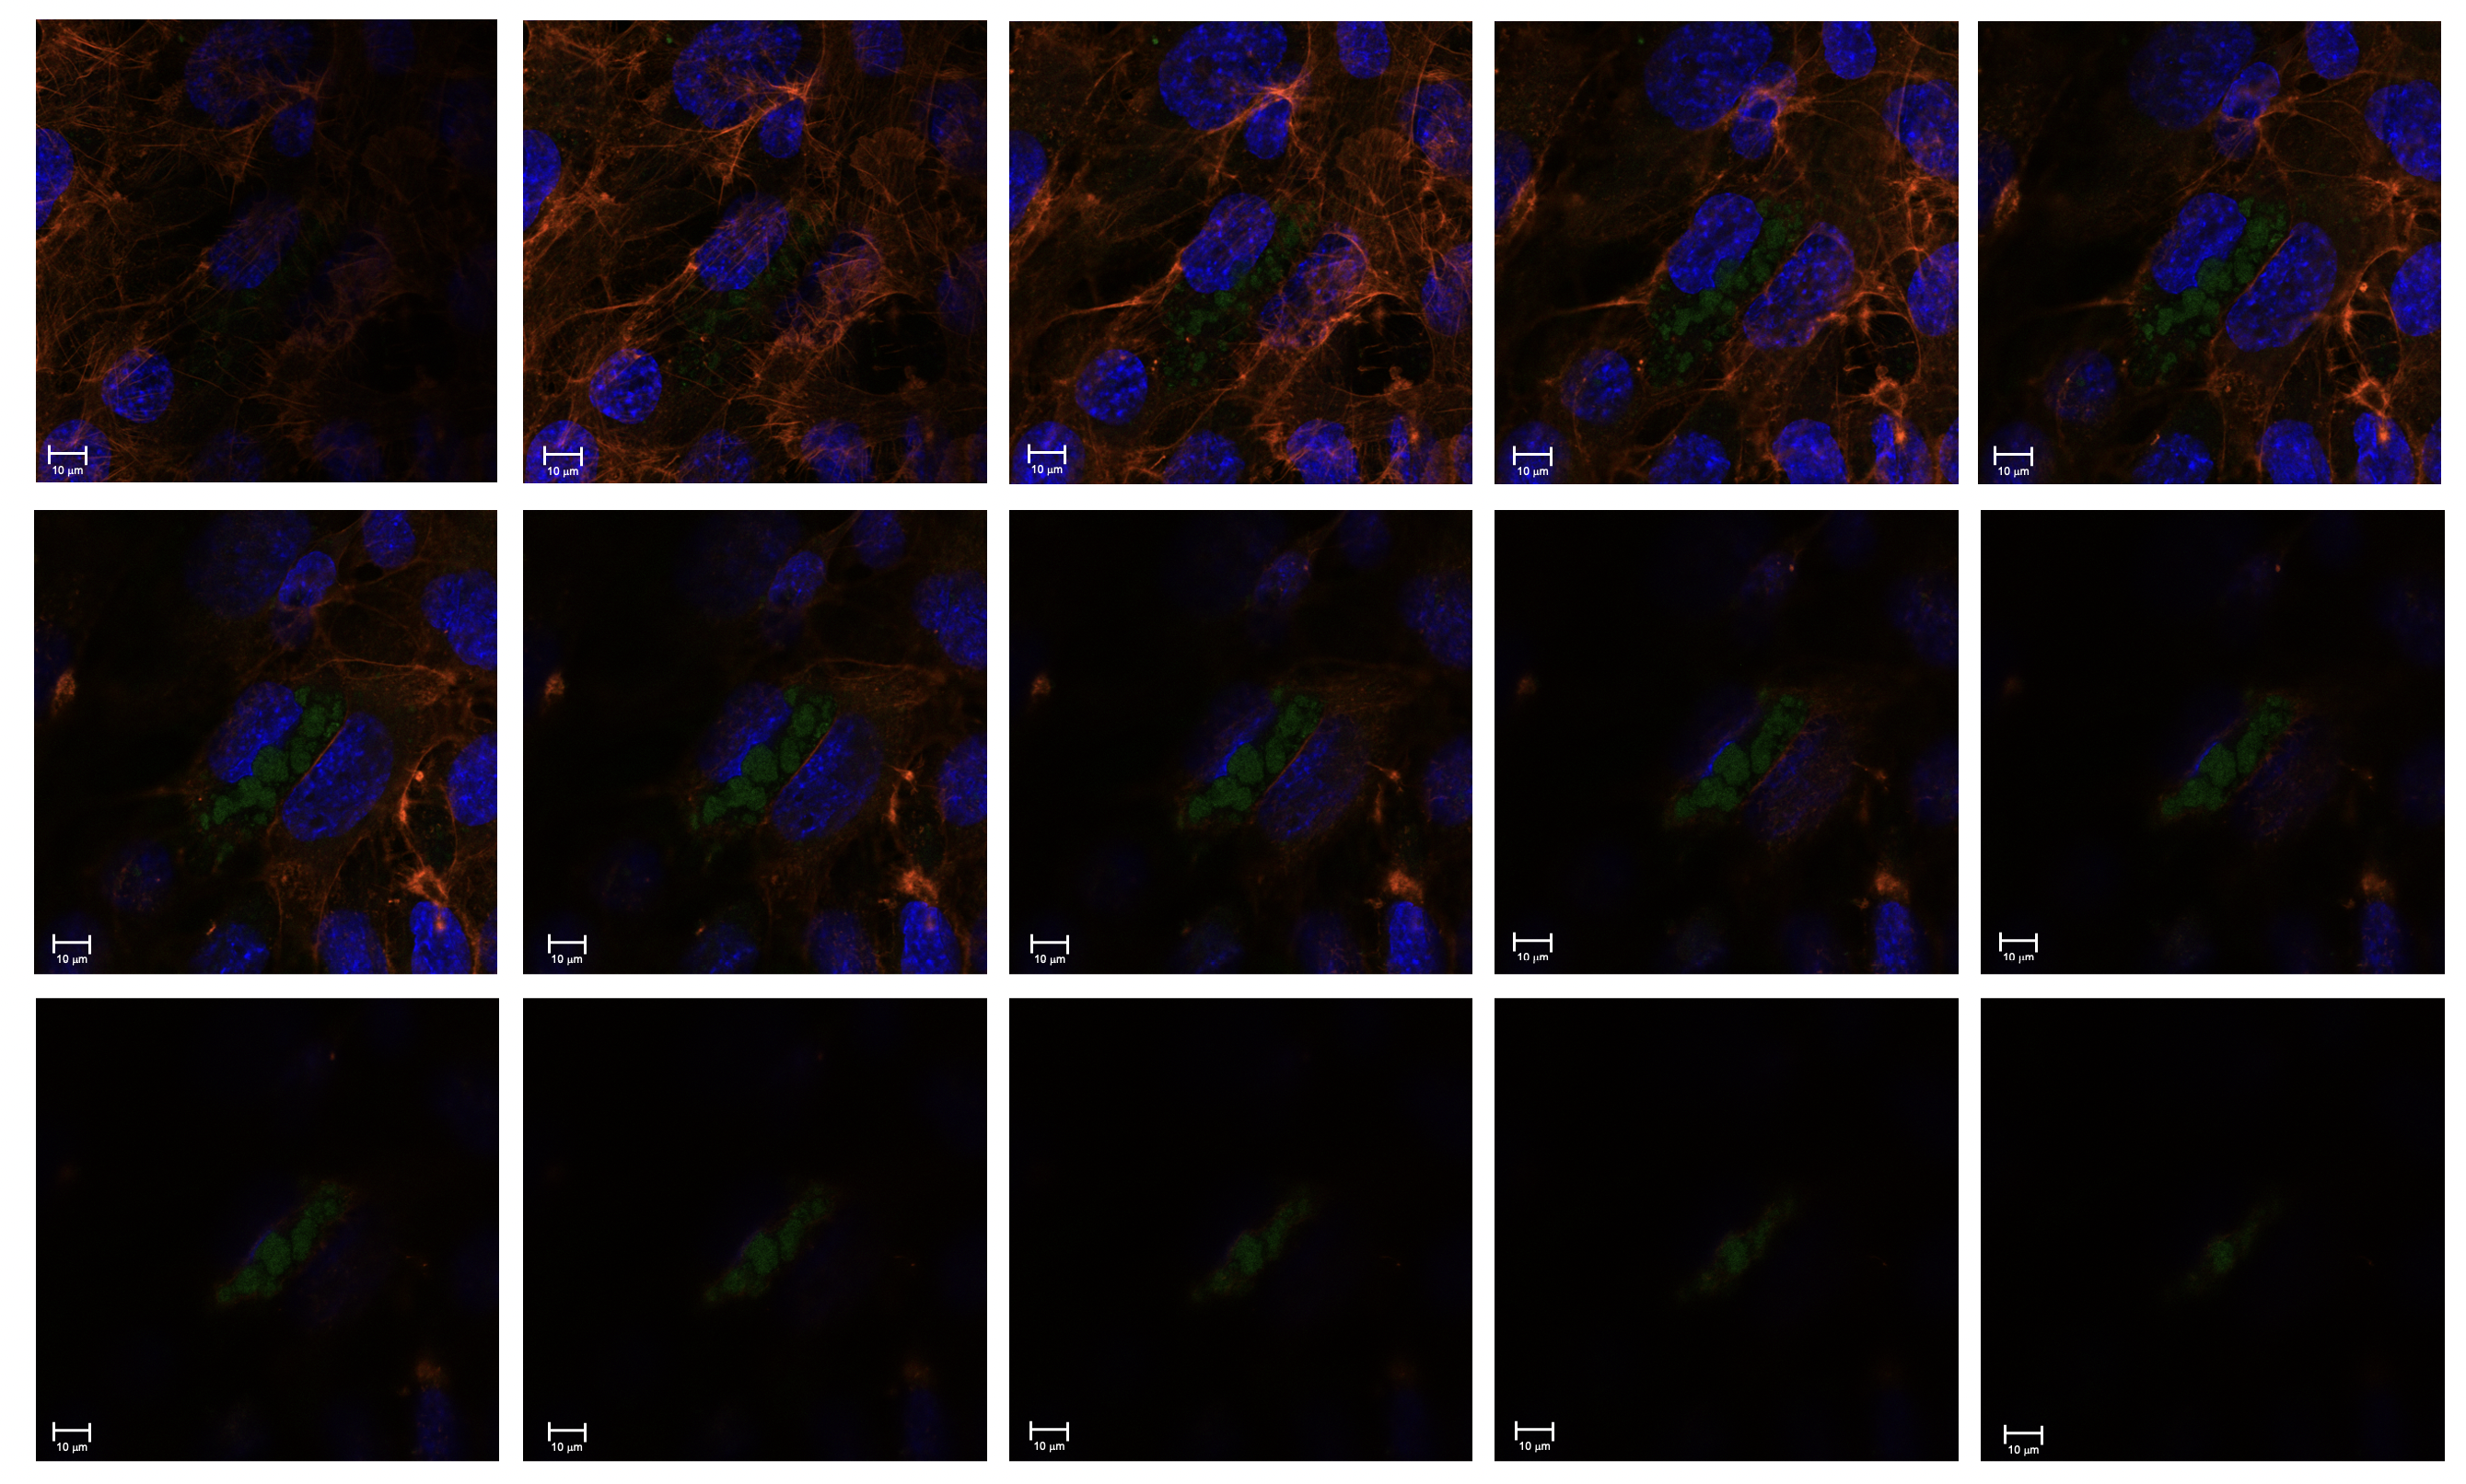
**

**Figure 2S** Z-stackimages of HUVEC cells treated with NH@FITC-dex. Green: FITC-dex (λex 490 nm) loaded into N3; blue: Hoechst dye (λex 361 nm/ λem 497 nm) specific for nuclei staining; red: TRITC (λex 514 nm and λem 580 nm) for actin fibers staining. Scale bar: 10 mm.
